# Supplementary material for: MiYoga: a randomised controlled trial of a mindfulness movement programme based on hatha yoga principles for children with cerebral palsy: a study protocol
Source: PubMed Central journal article supplement — BMJ Open. 2017 Jul 10;7(7):e015191. doi: 10.1136/bmjopen-2016-015191 (PMC5541628; doi:10.1136/bmjopen-2016-015191), 2017-07-10
Supplement: bmjopen-2016-015191supp001.pdf [file bmjopen-2016-015191supp001.pdf]

Appendix A  
MiYoga Program Summary

| Week<br>1 | Theme                                                                                                                                                                                                          | Welcome                                                                                                                                                                                                                                                                                                                                    | Introduction to<br>Mindfulness                                                                                                                                | Hatha Yoga                                                                                                                                                                                                                                                                 | End of Session                                                                                                                                                                                                                                                                                      |
|-----------|----------------------------------------------------------------------------------------------------------------------------------------------------------------------------------------------------------------|--------------------------------------------------------------------------------------------------------------------------------------------------------------------------------------------------------------------------------------------------------------------------------------------------------------------------------------------|---------------------------------------------------------------------------------------------------------------------------------------------------------------|----------------------------------------------------------------------------------------------------------------------------------------------------------------------------------------------------------------------------------------------------------------------------|-----------------------------------------------------------------------------------------------------------------------------------------------------------------------------------------------------------------------------------------------------------------------------------------------------|
|           | <p>Explore our everyday life with awareness in the present moment</p> <p>Focus of session is on being mindful while performing yoga postures; and to teach participants their individualised modifications</p> | <p>Getting to know you – pass the ball around in a circle.</p> <p>Explain the that over the next 6 weeks we are be training to be explorers of our feelings, our thoughts and things in our everyday life</p> <ul style="list-style-type: none"> <li>• Housekeeping</li> <li>• Give out MiYoga packs</li> <li>• Set group rules</li> </ul> | <p>Introduction to mindfulness and mindful movements ie. raise arms with awareness and discuss if they feel any different.</p>                                | <p>Go through yoga postures.</p> <p>Therapist will teach participant their modifications to each posture and teach participants how to safely go in and out of each posture.</p> <p><b><u>Mindfulness relaxation</u></b></p> <p>Progressive muscle relaxation exercise</p> | <p>Discussion - what they experienced through their exploration today and time for any questions.</p> <p>Remind them of their homework 20 minutes of practice a day along with poster and CD and to record their daily practices in their diary.</p> <p>Complete end of session questionnaires.</p> |
| Week<br>2 | Theme                                                                                                                                                                                                          | Review and Mindfulness<br>Explorations                                                                                                                                                                                                                                                                                                     | Hatha Yoga                                                                                                                                                    | Mindfulness relaxation                                                                                                                                                                                                                                                     | End of Session                                                                                                                                                                                                                                                                                      |
|           | <p>Senses: Feel/Touch</p>                                                                                                                                                                                      | <p>Review last session and briefly discuss home practice in the last week.</p> <p>Introduction to Feel/Touch</p> <p>Exploration exercises</p> <ol style="list-style-type: none"> <li>1) Feel and describe object with hands</li> <li>2) Whose hands are they?</li> <li>3) Mirror Me</li> </ol>                                             | <p>Practise yoga postures.</p> <p>Therapist will monitor participant's progress and continue to modify the poses as the child progresses in each posture.</p> | <p>Body Scan</p>                                                                                                                                                                                                                                                           | <p>Discuss what they experienced during the body scan and from the session.</p> <p>Remind them of their homework 20 minutes of practice a day along with poster and CD and to record their daily practices in their diary.</p> <p>Complete end of session questionnaires.</p>                       |

| <b>Week<br/>3</b> | <b>Theme</b> | <b>Review and Mindfulness<br/>Explorations</b>                                                                                                                                                                                                                                                           | <b>Hatha Yoga</b>                                                                                                                                                                                                                                                   | <b>Mindfulness<br/>relaxation</b>          | <b>End of Session</b>                                                                                                                                                                                                                                                                                |
|-------------------|--------------|----------------------------------------------------------------------------------------------------------------------------------------------------------------------------------------------------------------------------------------------------------------------------------------------------------|---------------------------------------------------------------------------------------------------------------------------------------------------------------------------------------------------------------------------------------------------------------------|--------------------------------------------|------------------------------------------------------------------------------------------------------------------------------------------------------------------------------------------------------------------------------------------------------------------------------------------------------|
|                   | Hearing      | <p>Review last session and briefly discuss home practice in the last week.</p> <p>Exploration exercises<br/>What do you hear?</p> <p>Sound exercises - clasp hands over ears, what do you notice?<br/>Make sounds with our breath – practice the ocean breath, pranayama (yogic breathing exercises)</p> | <p>Practise yoga postures.</p> <p>Incorporate ocean breath into the postures by linking movement with inhalation and exhalation.</p> <p>Therapist will monitor participant’s progress and continue to modify the poses as the child progresses in each posture.</p> | <p>Mindfulness of sound – Tibetan bowl</p> | <p>Discuss what they experienced/heard during the mindfulness exercise and from the session today.</p> <p>Remind them of their homework 20 minutes of practice a day along with poster and CD and to record their daily practices in their diary.</p> <p>Complete end of session questionnaires.</p> |

| <b>Week<br/>4</b> | <b>Theme</b> | <b>Review and Mindfulness<br/>Explorations</b>                                                                                                                                                                                         | <b>Hatha Yoga</b>                                                                                                                                                                                                                                              | <b>Mindfulness<br/>relaxation</b>               | <b>End of Session</b>                                                                                                                                                                                                                                      |
|-------------------|--------------|----------------------------------------------------------------------------------------------------------------------------------------------------------------------------------------------------------------------------------------|----------------------------------------------------------------------------------------------------------------------------------------------------------------------------------------------------------------------------------------------------------------|-------------------------------------------------|------------------------------------------------------------------------------------------------------------------------------------------------------------------------------------------------------------------------------------------------------------|
|                   | Seeing       | <p>Review last session and briefly discuss home practice in the last week.</p> <p>Introduction to Seeing</p> <p>Exploration exercises<br/>What colour eyes do your friends have?<br/>What did you see?<br/>Mindfulness of the hand</p> | <p>Sound exercises</p> <p>Pranayama exercises</p> <p>Incorporate sound into the postures by linking sounds with exhalation.</p> <p>Therapist will monitor participant’s progress and continue to modify the poses as the child progresses in each posture.</p> | <p>Short body scan and short imagery script</p> | <p>Discuss what they experienced from the session today.</p> <p>Remind them of their homework 20 minutes of practice a day along with poster and CD and to record their daily practices in their diary.</p> <p>Complete end of session questionnaires.</p> |

| <b>Week<br/>5</b> | <b>Theme</b>        | <b>Review and Mindfulness<br/>Explorations</b>                                                                                                                                                                                                                                                                                                                                                          | <b>Hatha Yoga</b>                                                                                                                                                                                                            | <b>Mindfulness<br/>relaxation</b>                                                                             | <b>End of Session</b>                                                                                                                                                                                                                                                                              |
|-------------------|---------------------|---------------------------------------------------------------------------------------------------------------------------------------------------------------------------------------------------------------------------------------------------------------------------------------------------------------------------------------------------------------------------------------------------------|------------------------------------------------------------------------------------------------------------------------------------------------------------------------------------------------------------------------------|---------------------------------------------------------------------------------------------------------------|----------------------------------------------------------------------------------------------------------------------------------------------------------------------------------------------------------------------------------------------------------------------------------------------------|
|                   | Taste & smell       | Review last session and briefly discuss home practice in the last week.<br><br>Introduction to taste and smell<br><br>Exploration exercises<br>1) What are you eating?<br>2) Mindful eating<br>3) Mindful drinking                                                                                                                                                                                      | Eye movements<br><br>Sound exercises<br><br>Pranayama exercises<br><br>Practise yoga postures<br><br>Therapist will monitor participant's progress and continue to modify the poses as the child progresses in each posture. | Body Scan<br>or<br>Progressive muscle relaxation<br>or<br>Mindfulness of breath<br>or<br>Mindfulness of sound | Discuss their experienced from the session today.<br><br>Remind them of their homework 20 minutes of practice a day along with poster and CD and to record their daily practices in their diary.<br><br>Complete end of session questionnaires.                                                    |
| <b>Week<br/>6</b> | <b>Theme</b>        | <b>Review and Mindfulness<br/>Explorations</b>                                                                                                                                                                                                                                                                                                                                                          | <b>Hatha Yoga</b>                                                                                                                                                                                                            | <b>Mindfulness<br/>relaxation</b>                                                                             | <b>End of Session</b>                                                                                                                                                                                                                                                                              |
|                   | Thoughts & feelings | Review last session and briefly discuss home practice in the last week.<br><br>Introduction to feelings – can be pleasant and unpleasant but like senses it is helpful.<br>Exploration exercises<br>1) Explore thoughts and feelings through listening to short stories and/or music<br>2) Discussion of thoughts and feelings that arise in our lives.<br>3) Bubbles of thoughts and feelings exercise | Eye movements<br><br>Sound exercises<br><br>Pranayama exercises<br><br>Practise yoga postures<br><br>Therapist will monitor participant's progress and continue to modify the poses as the child progresses in each posture. | Short body scan and finding a comfortable place                                                               | Discuss thoughts and feelings about the session.<br><br>Remind them of their homework 20 minutes of practice a day along with poster and CD and to record their daily practices in their diary.<br><br>Organise times for phone/skype consultations<br><br>Complete end of session questionnaires. |

| <b>Week 7</b>             | <b>Theme</b>                | <b>Review</b>                                                                                                                                                                                                                                                            | <b>Q &amp; A and problem solve obstacles to practice</b>                                                                                                                                                              | <b>Planning and Setting Goals</b>                                                     |
|---------------------------|-----------------------------|--------------------------------------------------------------------------------------------------------------------------------------------------------------------------------------------------------------------------------------------------------------------------|-----------------------------------------------------------------------------------------------------------------------------------------------------------------------------------------------------------------------|---------------------------------------------------------------------------------------|
| <b>Phone consultation</b> | Maintaining MiYoga practice | <p>Review and briefly discuss home practice in the last week</p> <p>Was daily practice maintained?<br/>           What were barriers to practice?<br/>           What helped/encourage practice?</p> <p>Any other questions regarding mindfulness or their practice?</p> | <p>Address participants questions</p> <p>Problem solve ways to overcome barriers to practice – be as specific as possible</p> <p>Revisit – reasons for practice<br/>           - Benefits of yoga and mindfulness</p> | Goals and plans in regards to practice for the next week - be as specific as possible |

| <b>Week 8</b>             | <b>Theme</b>                | <b>Review</b>                                                                                                                                                                                                                                                            | <b>Q &amp; A and problem solve obstacles to practice</b>                                                                                                                                                              | <b>Planning and Setting Goals</b>                                                                                      |
|---------------------------|-----------------------------|--------------------------------------------------------------------------------------------------------------------------------------------------------------------------------------------------------------------------------------------------------------------------|-----------------------------------------------------------------------------------------------------------------------------------------------------------------------------------------------------------------------|------------------------------------------------------------------------------------------------------------------------|
| <b>Phone consultation</b> | Maintaining MiYoga practice | <p>Review and briefly discuss home practice in the last week</p> <p>Was daily practice maintained?<br/>           What were barriers to practice?<br/>           What helped/encourage practice?</p> <p>Any other questions regarding mindfulness or their practice?</p> | <p>Address participants questions</p> <p>Problem solve ways to overcome barriers to practice – be as specific as possible</p> <p>Revisit – reasons for practice<br/>           - Benefits of yoga and mindfulness</p> | <p>Goals and plans to continue practice - be as specific as possible</p> <p>Discuss maintaining practice over time</p> |
