# Supplementary material for: MiYoga: a randomised controlled trial of a mindfulness movement programme based on hatha yoga principles for children with cerebral palsy: a study protocol
Source: PubMed Central journal article supplement — BMJ Open. 2017 Jul 10;7(7):e015191. doi: 10.1136/bmjopen-2016-015191 (PMC5541628; doi:10.1136/bmjopen-2016-015191), 2017-07-10
Supplement: bmjopen-2016-015191supp003.pdf [file bmjopen-2016-015191supp003.pdf]

Appendix C

BRIEF HEALTH QUESTIONNAIRE (BHQ) - Caregiver

Name: \_\_\_\_\_

Address: \_\_\_\_\_

\_\_\_\_\_

Phone: ( ) \_\_\_\_\_ (W)

Phone: ( ) \_\_\_\_\_ (H)

Age: \_\_\_\_\_

DOB: \_\_\_\_\_

Relationship to Child: \_\_\_\_\_

*Please read the following questions very carefully. If you have any difficulty please advise the health professional.*

1. **Personal medical history.** Indicate symptoms that apply to you.

- Pain or discomfort in chest following exercise
- Poor exercise tolerance
- Frequent dizziness
- Frequent headaches
- Frequent backache
- Frequent aches or pains in an joints

Details \_\_\_\_\_

- Other current symptoms that exercise may affect

Details \_\_\_\_\_

2. **Lungs: Do you have any of the following conditions?**

Asthma

- Yes
- No

Details \_\_\_\_\_

Emphysema

- Yes
- No

Details \_\_\_\_\_

Bronchitis

- Yes
- No

Details \_\_\_\_\_

Shortness of Breath

- Yes
- No

Details \_\_\_\_\_

3. **Do you have any heart condition/problems that might preclude you from exercise?**

- Yes
- No

Details \_\_\_\_\_

4. **Seizures, fainting, blackouts and loss of consciousness?**

- Yes
- No

Details \_\_\_\_\_

5. **Headaches**

- Yes
- No

Details \_\_\_\_\_

6. **Sight or hearing difficulties**

- Yes
- No

Details \_\_\_\_\_

7. **Cervical Spine instability (e.g. Atlanto-axial)**

- Yes
- No

Details \_\_\_\_\_

8. **Spinal problems that cause pain or preclude exercise**

- Yes
- No

Details \_\_\_\_\_

9. **Are you pregnant?**

- Yes (number of weeks \_\_\_; due\_\_\_\_\_)
- No

Details \_\_\_\_\_

10. **Medication.** Are you taking any medication prescribed by your Doctor or other Health Care provider? If so, list details, i.e., type of drugs, dosage.

---

---

---

---

BRIEF HEALTH QUESTIONNAIRE – Child (caregiver report)

Name (child): \_\_\_\_\_

Address: \_\_\_\_\_

\_\_\_\_\_

Phone: ( ) \_\_\_\_\_ (W)

Phone: ( ) \_\_\_\_\_ (H)

Age: \_\_\_\_\_

DOB: \_\_\_\_\_

*Please read the following questions very carefully. If you have any difficulty please advise the health professional.*

1. **Personal medical history.** Indicate symptoms that apply to you.

Pain or discomfort at rest or with exercise

Details \_\_\_\_\_

- Frequent dizziness
- Frequent colds or flu
- Frequent headaches
- Frequent backache
- Other current symptoms that exercise may affect

Details \_\_\_\_\_

2. **Seizures, fainting, blackouts and loss of consciousness?**

Yes

No

Details \_\_\_\_\_

3. **Headaches**

Yes

No

Details \_\_\_\_\_

4. **Sight or hearing difficulties**

Yes

No

Details \_\_\_\_\_

5. **Cervical Spine instability (e.g. Atlanto-axial)**

Yes

No

Details \_\_\_\_\_

6. **Spinal problems that cause pain or preclude exercise**

Yes

No

Details \_\_\_\_\_

7. **Medication.** Are you taking any medication prescribed by your Doctor or other Health Care provider? If so, list details, i.e., type of drugs, dosage.

---

---

---

---
