# Supplementary material for: MiYoga: a randomised controlled trial of a mindfulness movement programme based on hatha yoga principles for children with cerebral palsy: a study protocol
Source: PubMed Central journal article supplement — BMJ Open. 2017 Jul 10;7(7):e015191. doi: 10.1136/bmjopen-2016-015191 (PMC5541628; doi:10.1136/bmjopen-2016-015191), 2017-07-10
Supplement: bmjopen-2016-015191supp004.pdf [file bmjopen-2016-015191supp004.pdf]

Appendix D

Participant ID: \_\_\_\_\_

DOB: \_\_\_\_\_

Age at Assessment: \_\_\_\_\_

|                                                                                           |                                        |                  |                                                       |
|-------------------------------------------------------------------------------------------|----------------------------------------|------------------|-------------------------------------------------------|
| <b>Date</b>                                                                               |                                        | <b>Examiner:</b> |                                                       |
| <b>CLASSIFICATION</b>                                                                     |                                        |                  |                                                       |
| CP motor type:                                                                            | 1 <sup>st</sup>                        | 2 <sup>nd</sup>  | Comments:                                             |
| No. of limbs involved                                                                     | Comments:                              |                  |                                                       |
| GMFCS level                                                                               | Comments:                              |                  |                                                       |
| FMS level                                                                                 |                                        |                  |                                                       |
| Handedness                                                                                | Right / Left / Mixed                   |                  |                                                       |
| MACS                                                                                      |                                        |                  |                                                       |
| Preferred sitting position                                                                | W-sitting<br>Long sitting- symmetrical | Ring sitting     | Side sitting- right left<br>Asymmetrical (right/left) |
| <b>STANDING</b>                                                                           |                                        |                  |                                                       |
| Unaided/ Aided                                                                            | Equipment Used:                        |                  |                                                       |
| <b>GAIT</b>                                                                               |                                        |                  |                                                       |
| Unaided/ aided Typically developing <b>Comments:</b>                                      |                                        |                  |                                                       |
| <b>Gait pattern:</b> True Equinus/ Apparent Equinus / Jump Knee / Crouch gait; Gage Type: |                                        |                  |                                                       |
| <b>SUPINE</b>                                                                             |                                        | <b>Comments</b>  |                                                       |
| Thomas Test (FFD)                                                                         |                                        |                  |                                                       |
| Abduction in Flex                                                                         |                                        |                  |                                                       |
| Dynam Abd in Flex                                                                         |                                        |                  |                                                       |
| Abduction in Ext                                                                          |                                        |                  |                                                       |
| Dynam Abd in Ext                                                                          |                                        |                  |                                                       |
| Popliteal angle                                                                           |                                        |                  |                                                       |
| Dynamic Hamstrings                                                                        |                                        |                  |                                                       |
| Kn Exten (Hip 0 deg)                                                                      |                                        |                  |                                                       |
| Dorsiflex (Kn in Ext)                                                                     |                                        |                  |                                                       |
| Dynam DF (Kn in Ext)                                                                      |                                        |                  |                                                       |
| <b>PRONE</b>                                                                              |                                        |                  |                                                       |
| Hip Int Rotation                                                                          |                                        |                  |                                                       |
| Hip Ext Rotation                                                                          |                                        |                  |                                                       |
| Femoral Neck angle (FNA)                                                                  |                                        |                  |                                                       |
| Staheli test                                                                              |                                        |                  |                                                       |
| <b>SPINE</b>                                                                              |                                        |                  |                                                       |
| Scoliosis                                                                                 | Yes / No                               | Convex to R/L    |                                                       |
| Rotation                                                                                  | Yes / No                               | To R / L         |                                                       |
| Spondylolisthesis                                                                         | Yes/ No                                |                  |                                                       |
| Other                                                                                     | Yes/No                                 |                  |                                                       |
| <b>Current skills:</b>                                                                    |                                        |                  |                                                       |
| <b>Medical Hx Check:</b>                                                                  |                                        |                  |                                                       |
| Past surgery                                                                              |                                        |                  |                                                       |
| Pain levels                                                                               |                                        |                  |                                                       |
| Seizures                                                                                  |                                        |                  |                                                       |
| Medication                                                                                |                                        |                  |                                                       |
| Botox                                                                                     |                                        |                  |                                                       |
| Past therapy                                                                              |                                        |                  |                                                       |
| Compliance in therapy                                                                     |                                        |                  |                                                       |
| <b>Comments:</b>                                                                          |                                        |                  |                                                       |
| <b>Spine at Risk: Yes/ No</b>                                                             |                                        |                  |                                                       |
| <b>Action:</b>                                                                            |                                        |                  |                                                       |
