# Supplementary material for: MiYoga: a randomised controlled trial of a mindfulness movement programme based on hatha yoga principles for children with cerebral palsy: a study protocol
Source: PubMed Central journal article supplement — BMJ Open. 2017 Jul 10;7(7):e015191. doi: 10.1136/bmjopen-2016-015191 (PMC5541628; doi:10.1136/bmjopen-2016-015191), 2017-07-10
Supplement: bmjopen-2016-015191supp005.pdf [file bmjopen-2016-015191supp005.pdf]

## Appendix E

### MiYoga Session Mindfulness Measure

We are interested in your experiences what you just experienced during our group session. **Read** each sentence. Then, circle the number that tells **how true** each sentence is about **your experience during our group session.**

|                                                                         | Never True | Rarely True | Sometimes True | Often True | Always True |
|-------------------------------------------------------------------------|------------|-------------|----------------|------------|-------------|
| 1. I stopped myself having thoughts or feelings that I don't like.      | 0          | 1           | 2              | 3          | 4           |
| 2. I was moving without noticing what I was doing.                      | 0          | 1           | 2              | 3          | 4           |
| 3. I noticed my thoughts or feelings.                                   | 0          | 1           | 2              | 3          | 4           |
| 4. It was hard for me to pay attention to what I was meant to be doing. | 0          | 1           | 2              | 3          | 4           |
| 5. I was focused on what I was doing.                                   | 0          | 1           | 2              | 3          | 4           |
