# Supplementary material for: MiYoga: a randomised controlled trial of a mindfulness movement programme based on hatha yoga principles for children with cerebral palsy: a study protocol
Source: PubMed Central journal article supplement — BMJ Open. 2017 Jul 10;7(7):e015191. doi: 10.1136/bmjopen-2016-015191 (PMC5541628; doi:10.1136/bmjopen-2016-015191), 2017-07-10
Supplement: bmjopen-2016-015191supp007.pdf [file bmjopen-2016-015191supp007.pdf]

## Session Feedback Scale

Name \_\_\_\_\_ Age (Yrs):\_\_ Gender:\_\_\_\_\_

Session # \_\_\_ Date: \_\_\_\_\_

Who is filling out this form? Please check one: Child\_\_\_\_ Caretaker\_\_\_\_

If caretaker, what is your relationship to this child? \_\_\_\_\_

How was our time together today? Please put a mark on the lines below to let us know how you feel.

What we did today was uncomfortable and did not suit my needs and

### Comfort

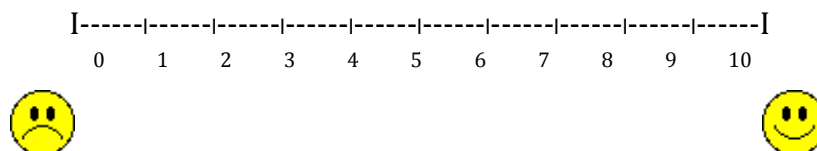

What we did today was comfortable and suited my needs and ability

I did not like what we did today.

### Enjoyment

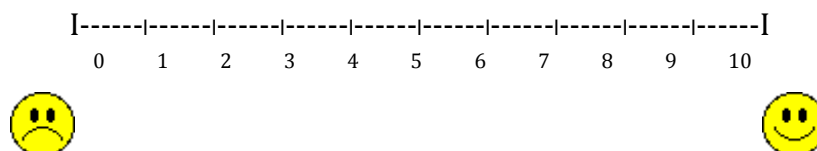

I liked what we did today.

I did not always notice how my body was moving during

### Body Awareness

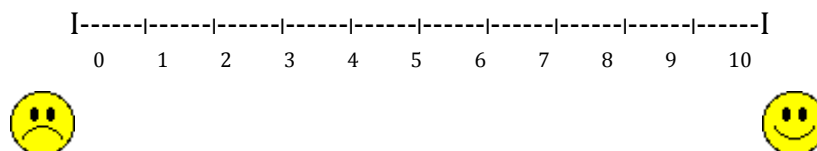

I noticed how my body was moving during the session.

Overall I disliked this

### Overall

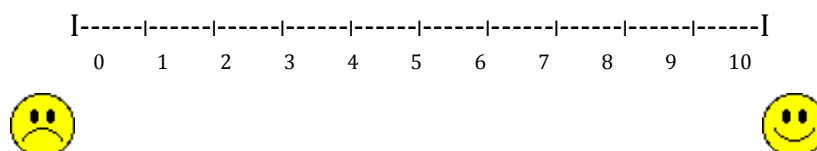

Overall I liked the session
