# Supplementary figures and images for: MiYoga: a randomised controlled trial of a mindfulness movement programme based on hatha yoga principles for children with cerebral palsy: a study protocol
Source: PubMed Central journal article supplement — BMJ Open. 2017 Jul 10;7(7):e015191. doi: 10.1136/bmjopen-2016-015191 (PMC5541628; doi:10.1136/bmjopen-2016-015191), 2017-07-10

Appendix F

**Mood Scale**

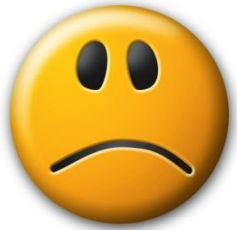

**1**

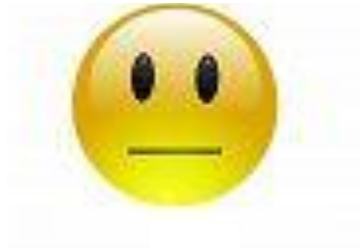

**3**

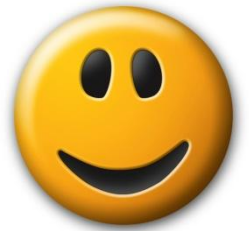

**5**

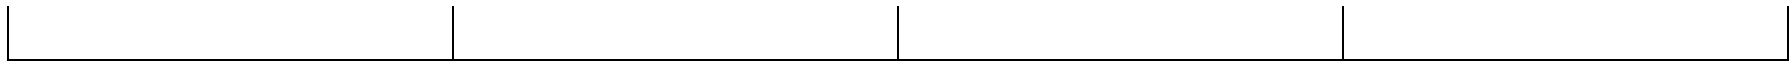

Very Bad

Bad

Neutral

Good

Very Good

Supplement: bmjopen-2016-015191supp006.pdf [file bmjopen-2016-015191supp006.pdf]
